# Supplementary material for: Bifunctional heterometallic Ln3+–Gd3+(Ln = Eu, Tb) hybrid silica microspheres: luminescence and MRI contrast agent property
Source: Royal Society of Chemistry journal article supplement (doi:10.1039/c2dt32014b), 2012-10-17
Supplement: c2dt32014b.pdf [file c2dt32014b.pdf]

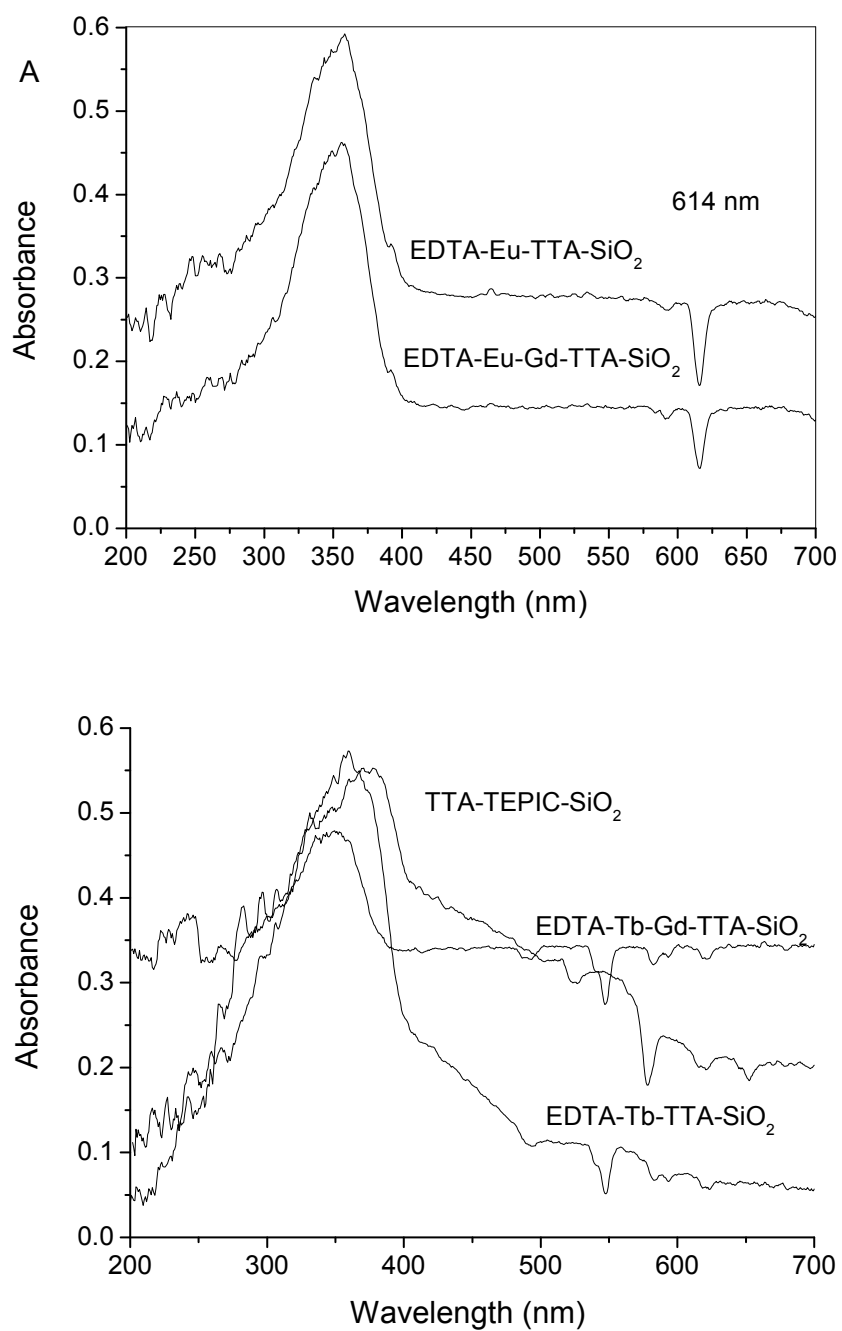

**Figure S1** Diffuse reflectivity spectra of (A) of europium bifunctional hybrids and (B) of terbium bifunctional hybrids

### The calculation of different parameters for the luminescence quantum efficiency

$A_r$  can be obtained by summing over the radiative rates  $A_{0J}$  for each  ${}^5D_0 \rightarrow {}^7F_J$  ( $J = 0-2$ ) transitions of  $\text{Eu}^{3+}$ :

$$A_{\text{rad}} = \sum A_{0J} = A_{00} + A_{01} + A_{02} \quad (1)$$

Since the branching ratio for the  ${}^5D_0 \rightarrow {}^7F_{3,4,5,6}$  transitions are too weak to be detected experimentally, so they can be neglected and their influence can also be ignored in the depopulation of the  ${}^5D_0$  excited state. The magnetic dipole  ${}^5D_0 \rightarrow {}^7F_1$  is considered as an internal reference for its independence of the chemical environments around  $\text{Eu}^{3+}$  and  $A_{0J}$ , the experimental coefficients of spontaneous emission, are calculated according to the equation.

$$A_{0J} = A_{01}(I_{0J}/I_{01})(\nu_{01}/\nu_{0J}) \quad (2)$$

Here  $\nu_{0J}$  refers to the energy barycenter ( $J = 0, 1, 2$ ), which can be determined as the reciprocal of the wavelength where the emission peaks of  $\text{Eu}^{3+}$ 's  ${}^5D_0 \rightarrow {}^7F_J$  emission transitions.  $A_{01}$ , the Einstein's coefficient of spontaneous emission ( ${}^5D_0 \rightarrow {}^7F_1$ ), can be determined to be  $50 \text{ s}^{-1}$  approximately ( $A_{01} = n^3 A_{01}(\text{vacuum})$ ) in vacuum.

Since the lifetime and the  $I_{02}/I_{01}$  (red/orange ratio) are the two mainly factors to determine the value  $\eta$ , so the longer lifetimes and bigger red/orange ratio, the higher the quantum efficiency. The relation among the radiative ( $A_r$ ), nonradiative ( $A_{nr}$ ) transition rates and lifetime ( $\tau$ ) can be described as the following equation

$$\tau_{\text{exp}} = (A_r + A_{nr})^{-1} \quad (3)$$

According to the radiative transition rate constant and experimental luminescence lifetime, the quantum efficiency can be calculated from the following equation:

$$\tau = A_r \tau_{\text{exp}} \quad (4)$$
